# Supplementary material for: A comprehensive Mendelian randomization study highlights the relationship between psychiatric disorders and non-tumor gastrointestinal diseases
Source: Front Genet. 2024 May 9;15:1392518. doi: 10.3389/fgene.2024.1392518 (PMC11129081; doi:10.3389/fgene.2024.1392518)
Supplement: Supplementary file 2 [file Table1.XLSX]

## Sheet: S1
Supplementary Table 1. Causal effects of PDs on NTGDs
ID	Exposure	Outcome	R2	Fmin	F	SNPs (n)	pval	MR analysis						Sensitivity analysis
								Inverse-variance-weighted		Weighted median		MR-egger		MR-PRESSO	IVW estimates		MR-egger pleiotropy test		significant	heterogeneity	pleiotropy
								pval	OR (95％CI)	pval	OR (95％CI)	pval	OR (95％CI)	Global pval	Cochran's Q	pval	MR Egger intercept	pval
1	Attention deficit	Duodenal ulcer	0.0311	36.44	197.3	9	5e-08	0.067182	1.317 (0.981, 1.770)	0.369292	1.200 (0.806, 1.787)	0.418884	0.603 (0.190, 1.912)	0.802667	4.59665	0.799687	0.0738401	0.212197	No	No	No
2	Anxiety disorders	Duodenal ulcer	0.0327	291.36	336.3	22	5e-06	0.297	1.188 (0.860, 1.640)	0.174	1.313 (0.887, 1.943)	0.219	1.617 (0.769, 3.399)	0.114	29.4048	0.104618	-0.0322397	0.375799	No	No	No
3	Major depression	Duodenal ulcer	0.016	137.83	184.51	44	5e-08	0.593363	0.884 (0.562, 1.390)	0.706807	0.894 (0.498, 1.605)	0.070074	11.547 (0.875, 152.330)	0.088	56.0357	0.0877498	-0.0781151	0.0541306	No	No	No
4	Depression	Duodenal ulcer	0.004	13.59	22.25	22	5e-06	0.299	1.531 (0.685, 3.421)	0.471	0.667 (0.222, 2.002)	1	1.000 (0.057, 17.519)	0.674333	17.7782	0.662994	0.0107384	0.76441	No	No	No
5	Schizophrenia	Duodenal ulcer	0.1884	134.26	244.89	73	5e-08	0.530842	1.037 (0.926, 1.161)	0.856671	0.985 (0.835, 1.162)	0.893039	1.030 (0.673, 1.575)	0.566	69.5073	0.56136	0.000583156	0.973788	No	No	No
6	Bipolar disorder	Duodenal ulcer	0.0377	221.7	271.01	12	5e-08	0.872589	0.976 (0.721, 1.320)	0.543884	0.894 (0.624, 1.282)	0.086905	0.206 (0.040, 1.053)	0.192667	14.6562	0.198783	0.146572	0.0873617	No	No	No
7	Autism spectrum disorder	Duodenal ulcer	0.0688	61.46	117.97	29	5e-06	0.955	0.995 (0.822, 1.204)	0.822	1.032 (0.787, 1.353)	0.895	0.961 (0.540, 1.711)	0.421	28.4971	0.438353	0.00318526	0.903494	No	No	No
8	Mental disorder	Duodenal ulcer	0.1246	3529.69	4920.07	6	5e-06	0.294	1.098 (0.923, 1.306)	0.326	1.106 (0.905, 1.351)	0.976	0.989 (0.497, 1.966)	0.251667	6.77023	0.238297	0.029408	0.772083	No	No	No
9	Attention deficit	Gastric ulcer	0.0311	36.44	197.3	9	5e-08	0.734108	1.063 (0.747, 1.512)	0.371754	1.155 (0.842, 1.583)	0.527842	0.621 (0.152, 2.536)	0.0256667	19.2481	0.0135878	0.0509132	0.463649	No	Yes	No
10	Anxiety disorders	Gastric ulcer	0.0327	291.36	336.3	22	5e-06	0.142	1.170 (0.949, 1.444)	0.978	1.004 (0.757, 1.332)	0.749	0.923 (0.571, 1.494)	0.693	17.492	0.680884	0.0247129	0.296257	No	No	No
11	Major depression	Gastric ulcer	0.016	137.83	184.51	44	5e-08	0.000237	1.812 (1.320, 2.487)	0.013335	1.720 (1.119, 2.643)	0.041261	7.216 (1.146, 45.416)	0.353	46.3254	0.336784	-0.0420113	0.142604	Yes	No	No
12	Depression	Gastric ulcer	0.004	13.59	22.25	22	5e-06	0.078	1.870 (0.933, 3.749)	0.066	2.393 (0.943, 6.072)	0.196	5.478 (0.452, 66.371)	0.193	26.5357	0.186754	-0.0270782	0.389458	No	No	No
13	Schizophrenia	Gastric ulcer	0.1884	134.26	244.89	73	5e-08	0.906757	1.005 (0.921, 1.097)	0.3998	1.055 (0.932, 1.194)	0.284524	1.197 (0.863, 1.659)	0.729667	64.865	0.71205	-0.0147641	0.280972	No	No	No
14	Bipolar disorder	Gastric ulcer	0.0377	221.7	271.01	12	5e-08	0.577661	0.930 (0.722, 1.199)	0.071728	0.744 (0.540, 1.026)	0.247563	0.391 (0.087, 1.751)	0.109333	17.382	0.097072	0.0817239	0.276951	No	No	No
15	Autism spectrum disorder	Gastric ulcer	0.0688	61.46	117.97	29	5e-06	0.559	1.047 (0.898, 1.220)	0.349	1.106 (0.896, 1.364)	0.575	1.143 (0.721, 1.813)	0.316667	30.9865	0.31768	-0.00826703	0.69458	No	No	No
16	Mental disorder	Gastric ulcer	0.1246	3529.69	4920.07	6	5e-06	0.709	0.978 (0.872, 1.097)	0.592	0.961 (0.831, 1.111)	0.156	0.694 (0.460, 1.047)	0.488	4.57268	0.470218	0.0969351	0.163138	No	No	No
17	Attention deficit	Gastroduodenal ulcer	0.0311	36.44	197.3	9	5e-08	0.228686	1.152 (0.915, 1.450)	0.450709	1.105 (0.852, 1.433)	0.177004	0.552 (0.254, 1.199)	0.179667	12.4158	0.133592	0.0696582	0.0959652	No	No	No
18	Anxiety disorders	Gastroduodenal ulcer	0.0327	291.36	336.3	22	5e-06	0.116	1.147 (0.967, 1.361)	0.281	1.144 (0.896, 1.459)	0.783	1.057 (0.715, 1.564)	0.751667	16.3407	0.750215	0.00848066	0.656137	No	No	No
19	Major depression	Gastroduodenal ulcer	0.016	137.83	184.51	44	5e-08	0.023666	1.365 (1.043, 1.788)	0.029051	1.485 (1.041, 2.119)	0.011776	7.672 (1.684, 34.950)	0.206667	50.6658	0.196827	-0.052476	0.02879	Yes	No	Yes
20	Depression	Gastroduodenal ulcer	0.004	13.59	22.25	22	5e-06	0.06	1.742 (0.976, 3.108)	0.345	1.439 (0.676, 3.060)	0.281	3.270 (0.403, 26.564)	0.148	27.7193	0.148292	-0.0158787	0.54607	No	No	No
21	Schizophrenia	Gastroduodenal ulcer	0.1884	134.26	244.89	73	5e-08	0.890462	0.995 (0.921, 1.074)	0.993645	1.000 (0.898, 1.115)	0.427548	1.125 (0.843, 1.500)	0.169	84.3046	0.152205	-0.0103857	0.389478	No	No	No
22	Bipolar disorder	Gastroduodenal ulcer	0.0377	221.7	271.01	12	5e-08	0.441032	0.914 (0.728, 1.149)	0.253417	0.861 (0.665, 1.114)	0.085142	0.296 (0.085, 1.032)	0.036	21.1882	0.0314731	0.106062	0.102943	No	Yes	No
23	Autism spectrum disorder	Gastroduodenal ulcer	0.0688	61.46	117.97	29	5e-06	0.711	1.025 (0.899, 1.168)	0.7	1.033 (0.877, 1.215)	0.773	1.060 (0.715, 1.573)	0.212	34.0315	0.199839	-0.0031856	0.859493	No	No	No
24	Mental disorder	Gastroduodenal ulcer	0.1246	3529.69	4920.07	6	5e-06	0.89	0.992 (0.879, 1.118)	0.968	1.003 (0.884, 1.137)	0.29	0.775 (0.514, 1.168)	0.172667	8.26259	0.142345	0.0694174	0.287039	No	No	No
25	Attention deficit	Gastroesophageal reflux disease	0.0137	127.21	153.38	5	5e-08	0.0001	1.251 (1.118, 1.401)	1e-06	1.235 (1.133, 1.345)	0.752164	0.860 (0.366, 2.020)	0.0496667	15.8897	0.00317086	0.0306815	0.448942	Yes	Yes	No
26	Anxiety disorders	Gastroesophageal reflux disease	0.0046	330.74	337.13	3	5e-06	0.443	1.101 (0.861, 1.406)	0.508	1.044 (0.918, 1.187)	0.287	0.671 (0.459, 0.980)	NA	16.1533	0.000310704	0.0467686	0.225545	No	Yes	No
27	Major depression	Gastroesophageal reflux disease	0.007	140.28	186.43	19	5e-08	0	1.929 (1.741, 2.138)	0	1.884 (1.657, 2.143)	0.304043	1.482 (0.716, 3.071)	0.232667	30.0288	0.0371672	0.00772175	0.483252	Yes	Yes	No
28	Depression	Gastroesophageal reflux disease	0.0015	13.59	20.41	9	5e-06	0.01	1.560 (1.114, 2.184)	0.045	1.305 (1.006, 1.693)	0.166	2.814 (0.758, 10.442)	0.00166667	32.1792	8.65024e-05	-0.014432	0.391568	Yes	Yes	No
29	Schizophrenia	Gastroesophageal reflux disease	0.0743	134.46	199.41	31	5e-08	0.196447	1.029 (0.985, 1.074)	0.61127	0.990 (0.954, 1.028)	0.480074	0.886 (0.635, 1.235)	<0.001	92.1741	3.06328e-08	0.0113106	0.380552	No	Yes	No
30	Bipolar disorder	Gastroesophageal reflux disease	0.0147	226.6	247.94	5	5e-08	0.70777	0.989 (0.934, 1.048)	0.783338	1.010 (0.941, 1.084)	0.43126	0.847 (0.592, 1.213)	0.394333	4.38522	0.356375	0.0142702	0.453592	No	No	No
31	Autism spectrum disorder	Gastroesophageal reflux disease	0.0247	90.9	117.58	10	5e-06	0.232	1.027 (0.983, 1.072)	0.517	1.020 (0.960, 1.085)	0.554	1.071 (0.862, 1.329)	0.477667	8.74348	0.461283	-0.00334266	0.708663	No	No	No
32	Mental disorder	Gastroesophageal reflux disease	0.0176	3705.12	3705.12	1	5e-06	0.507	1.017 (0.967, 1.070)	NA	NA (NA, NA)	NA	NA (NA, NA)	NA	NA	NA	NA	NA	No	NA	NA
33	Attention deficit	Irritable bowel syndrome	0.0311	36.44	197.3	9	5e-08	0.195165	1.127 (0.941, 1.350)	0.475483	1.093 (0.856, 1.395)	0.61939	0.830 (0.410, 1.678)	0.639333	6.244	0.619921	0.0289705	0.407319	No	No	No
34	Anxiety disorders	Irritable bowel syndrome	0.0327	291.36	336.3	22	5e-06	0.736	1.029 (0.871, 1.216)	0.862	1.021 (0.810, 1.286)	0.695	0.925 (0.631, 1.357)	0.708	17.2779	0.694126	0.0110989	0.551293	No	No	No
35	Major depression	Irritable bowel syndrome	0.016	137.83	184.51	44	5e-08	5.7e-05	1.645 (1.291, 2.097)	0.010924	1.554 (1.107, 2.183)	0.623413	1.432 (0.345, 5.933)	0.666	39.0576	0.642937	0.00422795	0.846747	Yes	No	No
36	Depression	Irritable bowel syndrome	0.004	13.59	22.25	22	5e-06	0.569	1.169 (0.683, 1.999)	0.853	0.933 (0.446, 1.950)	0.976	0.970 (0.137, 6.878)	0.254333	24.9977	0.247262	0.00469038	0.848146	No	No	No
37	Schizophrenia	Irritable bowel syndrome	0.1884	134.26	244.89	73	5e-08	0.04629	1.078 (1.001, 1.161)	0.086408	1.096 (0.987, 1.218)	0.145796	0.816 (0.623, 1.070)	0.186333	82.1949	0.192845	0.0235391	0.0401477	Yes	No	Yes
38	Bipolar disorder	Irritable bowel syndrome	0.0377	221.7	271.01	12	5e-08	0.612698	1.052 (0.866, 1.277)	0.718268	0.959 (0.762, 1.206)	0.949562	0.960 (0.283, 3.257)	0.147333	16.1288	0.136418	0.00853837	0.885606	No	No	No
39	Autism spectrum disorder	Irritable bowel syndrome	0.0688	61.46	117.97	29	5e-06	0.764	1.019 (0.899, 1.156)	0.413	1.071 (0.908, 1.263)	0.231	1.259 (0.871, 1.820)	0.241667	32.8645	0.240768	-0.0198957	0.242573	No	No	No
40	Mental disorder	Irritable bowel syndrome	0.1246	3529.69	4920.07	6	5e-06	0.418	0.963 (0.879, 1.055)	0.322	0.942 (0.837, 1.060)	0.167	0.755 (0.544, 1.047)	0.488667	4.72114	0.450852	0.068651	0.202941	No	No	No
41	Attention deficit	Inflammatory bowel disease	0.0311	36.44	197.3	9	5e-08	0.888649	1.010 (0.876, 1.165)	0.763935	0.971 (0.800, 1.178)	0.106896	1.797 (0.965, 3.346)	0.492	7.55166	0.478442	-0.0531305	0.104146	No	No	No
42	Anxiety disorders	Inflammatory bowel disease	0.0327	291.36	336.3	22	5e-06	0.66	0.972 (0.857, 1.102)	0.31	0.911 (0.761, 1.091)	0.299	0.879 (0.694, 1.114)	0.97	10.5933	0.970133	0.0125367	0.337496	No	No	No
43	Major depression	Inflammatory bowel disease	0.0169	137.83	183.46	47	5e-08	0.694452	1.056 (0.806, 1.383)	0.71292	1.057 (0.788, 1.418)	0.462018	1.754 (0.398, 7.735)	<0.001	102.532	3.42365e-06	-0.0155923	0.498814	No	Yes	No
44	Depression	Inflammatory bowel disease	0.004	13.59	22.25	22	5e-06	0.519	1.143 (0.761, 1.717)	0.165	1.448 (0.858, 2.442)	0.196	2.582 (0.642, 10.383)	0.257	24.6663	0.261905	-0.0207874	0.244565	No	No	No
45	Schizophrenia	Inflammatory bowel disease	0.1956	134.26	240.12	78	5e-08	0.00466	1.096 (1.029, 1.169)	0.052295	1.085 (0.999, 1.178)	0.175127	1.227 (0.915, 1.644)	0.0146667	106.782	0.0139771	-0.00913522	0.443042	Yes	Yes	No
46	Bipolar disorder	Inflammatory bowel disease	0.0436	221.7	270.75	14	5e-08	0.018843	1.158 (1.025, 1.310)	0.132036	1.124 (0.965, 1.309)	0.15495	0.581 (0.288, 1.171)	0.311	15.347	0.286192	0.0645711	0.0743289	Yes	No	No
47	Autism spectrum disorder	Inflammatory bowel disease	0.0844	61.46	129.31	33	5e-06	0.818	0.988 (0.896, 1.091)	0.325	0.937 (0.823, 1.067)	0.125	1.239 (0.949, 1.618)	0.125333	41.8029	0.115021	-0.0216647	0.0849003	No	No	No
48	Mental disorder	Inflammatory bowel disease	0.1246	3529.69	4920.07	6	5e-06	0.427	0.959 (0.865, 1.063)	0.593	0.971 (0.872, 1.081)	0.29	0.774 (0.513, 1.168)	0.180667	8.89819	0.113195	0.0569691	0.351811	No	No	No
49	Attention deficit	Crohn's disease	0.0311	36.44	197.3	9	5e-08	0.814879	0.977 (0.804, 1.188)	0.445449	0.907 (0.705, 1.166)	0.639703	1.239 (0.525, 2.922)	0.71	5.37472	0.716877	-0.0218445	0.594855	No	No	No
50	Anxiety disorders	Crohn's disease	0.0327	291.36	336.3	22	5e-06	0.745	1.028 (0.869, 1.217)	0.822	1.028 (0.808, 1.307)	0.88	1.025 (0.751, 1.399)	0.837	14.9622	0.824843	0.000458716	0.978771	No	No	No
51	Major depression	Crohn's disease	0.0169	137.83	183.46	47	5e-08	0.771238	1.054 (0.738, 1.507)	0.996191	1.001 (0.684, 1.465)	0.402211	2.353 (0.324, 17.108)	<0.001	96.0903	2.1547e-05	-0.0246179	0.424138	No	Yes	No
52	Depression	Crohn's disease	0.004	13.59	22.25	22	5e-06	0.23	1.405 (0.806, 2.451)	0.798	1.100 (0.528, 2.294)	0.166	4.147 (0.596, 28.852)	0.269	24.4826	0.270266	-0.0274349	0.267589	No	No	No
53	Schizophrenia	Crohn's disease	0.1956	134.26	240.12	78	5e-08	0.035887	1.100 (1.006, 1.203)	0.299178	1.061 (0.949, 1.186)	0.22182	1.294 (0.859, 1.949)	0.006	113.129	0.0046281	-0.013155	0.43017	Yes	Yes	No
54	Bipolar disorder	Crohn's disease	0.0436	221.7	270.75	14	5e-08	0.079029	1.204 (0.979, 1.480)	0.244943	1.136 (0.916, 1.409)	0.050412	0.303 (0.103, 0.889)	0.0453333	23.4584	0.036493	0.129067	0.0256866	No	Yes	Yes
55	Autism spectrum disorder	Crohn's disease	0.0844	61.46	129.31	33	5e-06	0.514	0.956 (0.834, 1.095)	0.957	1.005 (0.843, 1.198)	0.09	1.380 (0.962, 1.979)	0.085	43.4219	0.0857272	-0.0353013	0.040575	No	No	Yes
56	Mental disorder	Crohn's disease	0.1246	3529.69	4920.07	6	5e-06	0.618	0.955 (0.795, 1.146)	0.679	0.969 (0.834, 1.126)	0.741	0.862 (0.380, 1.955)	0.0323333	14.5104	0.0126725	0.0269596	0.813874	No	Yes	No
57	Attention deficit	Ulcerative colitis	0.0311	36.44	197.3	9	5e-08	0.630285	1.052 (0.855, 1.296)	0.244045	1.156 (0.906, 1.475)	0.093903	2.180 (0.991, 4.797)	0.233333	10.7671	0.215247	-0.0672342	0.10513	No	No	No
58	Anxiety disorders	Ulcerative colitis	0.0327	291.36	336.3	22	5e-06	0.417	0.936 (0.797, 1.098)	0.447	0.917 (0.732, 1.147)	0.203	0.815 (0.600, 1.106)	0.843667	14.0123	0.869072	0.017025	0.308555	No	No	No
59	Major depression	Ulcerative colitis	0.0169	137.83	183.46	47	5e-08	0.574254	1.086 (0.815, 1.447)	0.740818	1.059 (0.753, 1.490)	0.669114	1.411 (0.294, 6.779)	0.006	73.2011	0.00654342	-0.0080617	0.740586	No	Yes	No
60	Depression	Ulcerative colitis	0.004	13.59	22.25	22	5e-06	0.84	0.951 (0.581, 1.555)	0.945	1.024 (0.518, 2.026)	0.585	1.622 (0.293, 8.966)	0.333667	23.0062	0.34365	-0.0136881	0.529175	No	No	No
61	Schizophrenia	Ulcerative colitis	0.1956	134.26	240.12	78	5e-08	0.009677	1.108 (1.025, 1.198)	0.092805	1.088 (0.986, 1.201)	0.277282	1.222 (0.853, 1.751)	0.0393333	100.757	0.0359863	-0.00794199	0.586596	Yes	Yes	No
62	Bipolar disorder	Ulcerative colitis	0.0436	221.7	270.75	14	5e-08	0.028702	1.172 (1.017, 1.351)	0.055819	1.194 (0.996, 1.433)	0.985349	0.992 (0.410, 2.397)	0.945333	6.17017	0.93974	0.0156421	0.713466	Yes	No	No
63	Autism spectrum disorder	Ulcerative colitis	0.0844	61.46	129.31	33	5e-06	0.68	1.027 (0.905, 1.165)	0.746	1.028 (0.871, 1.212)	0.457	1.146 (0.803, 1.637)	0.093	43.2016	0.0893098	-0.0105501	0.520904	No	No	No
64	Mental disorder	Ulcerative colitis	0.1246	3529.69	4920.07	6	5e-06	0.2	0.939 (0.852, 1.034)	0.519	0.959 (0.846, 1.088)	0.14	0.695 (0.472, 1.024)	0.729667	3.09451	0.685417	0.0802131	0.191738	No	No	No

## Sheet: S2
Supplementary Table 2. Causal effects of NTGDs on PDs .
ID	Exposure	Outcome	R2	Fmin	F	SNPs (n)	pval	MR analysis						Sensitivity analysis
								Inverse-variance-weighted		Weighted median		MR-egger		MR-PRESSO	IVW estimates		MR-egger pleiotropy test		significant	heterogeneity	pleiotropy
								pval	OR (95％CI)	pval	OR (95％CI)	pval	OR (95％CI)	Global pval	Cochran's Q	pval	MR Egger intercept	pval
65	Duodenal ulcer	Attention deficit	0.1476	2582.73	3682.14	9	5e-06	0.372	0.977 (0.929, 1.028)	0.996	1.000 (0.936, 1.068)	0.324	1.170 (0.875, 1.565)	0.6	6.66028	0.573689	-0.0410606	0.257167	No	No	No
66	Duodenal ulcer	Anxiety disorders	0.2284	2582.73	4046.46	14	5e-06	0.639	1.009 (0.971, 1.049)	0.99	1.000 (0.955, 1.048)	0.385	1.041 (0.954, 1.137)	0.177667	18.1154	0.153188	-0.00949123	0.452362	No	No	No
67	Duodenal ulcer	Major depression	0.1976	2582.73	3927.05	12	5e-06	0.269	0.993 (0.981, 1.005)	0.469	0.994 (0.978, 1.010)	0.442	0.991 (0.968, 1.014)	0.794333	7.38974	0.7667	0.000805498	0.820359	No	No	No
68	Duodenal ulcer	Depression	0.0881	2649.6	3697.1	5	5e-06	0.603	0.992 (0.961, 1.023)	0.045	0.974 (0.950, 0.999)	0.608	0.944 (0.775, 1.151)	0.0596667	12.5024	0.0139812	0.0118668	0.654172	No	Yes	No
69	Duodenal ulcer	Schizophrenia	0.2128	2582.73	3979.15	13	5e-06	0.04	0.967 (0.936, 0.998)	0.176	0.970 (0.928, 1.014)	0.626	0.985 (0.927, 1.046)	0.604	10.6949	0.555227	-0.0063395	0.495322	Yes	No	No
70	Duodenal ulcer	Bipolar disorder	0.2128	2582.73	3979.15	13	5e-06	0.512	1.014 (0.972, 1.058)	0.867	0.995 (0.938, 1.055)	0.848	1.008 (0.929, 1.095)	0.363667	13.1815	0.355985	0.00196715	0.874706	No	No	No
71	Duodenal ulcer	Autism spectrum disorder	0.1801	2582.73	3821.02	11	5e-06	0.464	0.981 (0.931, 1.033)	0.238	0.963 (0.904, 1.026)	0.823	0.984 (0.858, 1.129)	0.257667	12.9239	0.22796	-0.000895633	0.960674	No	No	No
72	Duodenal ulcer	Mental disorder	0.2284	2582.73	4046.46	14	5e-06	0.416	1.049 (0.934, 1.179)	0.796	1.020 (0.876, 1.189)	0.302	0.868 (0.671, 1.123)	0.714333	9.9163	0.700764	0.0582698	0.131163	No	No	No
73	Gastric ulcer	Attention deficit	0.0406	1509.09	1631.9	5	5e-06	0.48	0.965 (0.875, 1.065)	0.691	0.976 (0.863, 1.102)	0.4	0.863 (0.641, 1.160)	0.841667	1.63207	0.803016	0.0235492	0.488442	No	No	No
74	Gastric ulcer	Anxiety disorders	0.08	1509.09	1859.88	9	5e-06	0.194	1.040 (0.980, 1.104)	0.27	1.045 (0.967, 1.129)	0.548	1.047 (0.908, 1.206)	0.341333	9.30514	0.317213	-0.0015212	0.926927	No	No	No
75	Gastric ulcer	Major depression	0.0526	1509.09	1781.32	6	5e-06	0.532	1.009 (0.982, 1.036)	0.24	1.021 (0.986, 1.057)	0.175	1.047 (0.991, 1.105)	0.678333	3.2858	0.656017	-0.00882541	0.199003	No	No	No
76	Gastric ulcer	Depression	0.0436	1509.09	1757.41	5	5e-06	0.959	1.001 (0.968, 1.035)	0.669	0.993 (0.959, 1.027)	0.358	0.950 (0.867, 1.042)	0.219667	6.39851	0.171299	0.0101186	0.324834	No	No	No
77	Gastric ulcer	Schizophrenia	0.0627	1509.09	1838.97	7	5e-06	0.893	0.995 (0.929, 1.066)	0.183	0.938 (0.854, 1.031)	0.296	1.087 (0.945, 1.250)	0.325	6.55925	0.363535	-0.0212324	0.221124	No	No	No
78	Gastric ulcer	Bipolar disorder	0.0627	1509.09	1838.97	7	5e-06	0.047	1.112 (1.001, 1.234)	0.046	1.122 (1.002, 1.257)	0.056	1.281 (1.053, 1.559)	0.21	9.59792	0.142638	-0.034114	0.169178	Yes	No	No
79	Gastric ulcer	Autism spectrum disorder	0.061	1509.09	1786.67	7	5e-06	0.933	1.004 (0.915, 1.101)	0.778	1.015 (0.915, 1.126)	0.839	0.976 (0.781, 1.220)	0.316333	7.77018	0.255429	0.0066434	0.791214	No	No	No
80	Gastric ulcer	Mental disorder	0.08	1509.09	1859.88	9	5e-06	0.787	0.973 (0.798, 1.186)	0.662	1.062 (0.812, 1.389)	0.707	1.092 (0.702, 1.700)	0.534333	7.11379	0.524407	-0.0285178	0.585081	No	No	No
81	Gastroduodenal ulcer	Attention deficit	0.0421	1027	1220.3	7	5e-06	0.939	1.005 (0.882, 1.146)	0.959	0.997 (0.879, 1.131)	0.25	1.407 (0.841, 2.354)	0.0773333	12.5298	0.0511405	-0.0466925	0.244171	No	No	No
82	Gastroduodenal ulcer	Anxiety disorders	0.0856	1027	1298.33	14	5e-06	0.887	0.996 (0.937, 1.058)	0.446	0.970 (0.896, 1.049)	0.24	0.923 (0.813, 1.048)	0.219667	16.6495	0.215826	0.0145198	0.2107	No	No	No
83	Gastroduodenal ulcer	Major depression	0.0594	1027	1225.4	10	5e-06	0.893	1.002 (0.977, 1.027)	0.403	1.014 (0.982, 1.046)	0.555	1.016 (0.966, 1.069)	0.317	10.7341	0.294378	-0.00268938	0.541193	No	No	No
84	Gastroduodenal ulcer	Depression	0.0462	1027	1175.31	8	5e-06	0.014	1.035 (1.007, 1.064)	0.21	1.023 (0.987, 1.061)	0.316	0.947 (0.859, 1.044)	0.374333	7.92028	0.339676	0.0125037	0.114328	Yes	No	No
85	Gastroduodenal ulcer	Schizophrenia	0.078	1027	1263.74	13	5e-06	0.767	1.009 (0.949, 1.074)	0.623	0.979 (0.901, 1.064)	0.371	0.943 (0.833, 1.067)	0.341333	13.3098	0.346933	0.0125354	0.240825	No	No	No
86	Gastroduodenal ulcer	Bipolar disorder	0.078	1027	1263.74	13	5e-06	0.194	0.938 (0.851, 1.033)	0.777	0.983 (0.876, 1.104)	0.848	0.980 (0.803, 1.197)	0.0326667	22.0999	0.0364154	-0.00835551	0.623374	No	Yes	No
87	Gastroduodenal ulcer	Autism spectrum disorder	0.053	1027	1207.56	9	5e-06	0.052	1.090 (0.999, 1.190)	0.06	1.117 (0.995, 1.254)	0.411	1.154 (0.837, 1.591)	0.817333	4.66611	0.792593	-0.00811244	0.728831	No	No	No
88	Gastroduodenal ulcer	Mental disorder	0.0856	1027	1298.33	14	5e-06	0.352	1.095 (0.905, 1.325)	0.899	0.984 (0.770, 1.258)	0.74	0.933 (0.623, 1.395)	0.727	9.64015	0.723062	0.0311199	0.39374	No	No	No
89	Gastroesophageal reflux disease	Attention deficit	0.0295	207.51	281.57	65	5e-08	0	2.112 (1.861, 2.396)	0	2.151 (1.814, 2.551)	0.001368	3.440 (1.670, 7.086)	0.075	86.6542	0.0312448	-0.0162091	0.183965	Yes	Yes	No
90	Gastroesophageal reflux disease	Anxiety disorders	0.0336	207.51	279.1	75	5e-08	0	1.425 (1.295, 1.568)	1e-06	1.372 (1.208, 1.558)	0.177766	1.482 (0.841, 2.612)	0.101667	91.8124	0.0785837	-0.00130874	0.889889	Yes	No	No
91	Gastroesophageal reflux disease	Major depression	0.0291	207.51	278.02	65	5e-08	0	1.513 (1.438, 1.592)	0	1.458 (1.372, 1.548)	0.275972	1.170 (0.884, 1.549)	<0.001	135.757	4.41955e-07	0.00848486	0.0725446	Yes	Yes	No
92	Gastroesophageal reflux disease	Depression	0.0295	207.51	281.38	65	5e-08	0	1.239 (1.196, 1.284)	0	1.214 (1.159, 1.271)	0.568231	1.058 (0.873, 1.282)	0.0273333	94.3906	0.00804203	0.00529657	0.106018	Yes	Yes	No
93	Gastroesophageal reflux disease	Schizophrenia	0.0318	207.51	275.17	72	5e-08	0.203971	1.118 (0.941, 1.328)	0.884187	1.011 (0.871, 1.174)	0.249212	0.504 (0.158, 1.602)	<0.001	294.508	5.25934e-29	0.0258845	0.176285	No	Yes	No
94	Gastroesophageal reflux disease	Bipolar disorder	0.0332	207.51	279.68	74	5e-08	0.667082	1.036 (0.881, 1.219)	0.092065	1.163 (0.976, 1.387)	0.18452	0.529 (0.208, 1.343)	<0.001	184.693	1.20834e-11	0.0222498	0.155144	No	Yes	No
95	Gastroesophageal reflux disease	Autism spectrum disorder	0.0298	207.51	280.68	66	5e-08	0.258365	1.084 (0.943, 1.246)	0.269495	1.101 (0.928, 1.305)	0.253302	1.603 (0.719, 3.574)	0.00166667	101.18	0.00272215	-0.0129716	0.335268	No	Yes	No
96	Gastroesophageal reflux disease	Mental disorder	0.0336	207.51	279.1	75	5e-08	0.465697	1.121 (0.824, 1.525)	0.766371	1.069 (0.688, 1.661)	0.825169	0.814 (0.133, 5.004)	0.45	74.707	0.455124	0.0105757	0.726996	No	No	No
97	Irritable bowel syndrome	Attention deficit	0.0362	929.61	1002.51	7	5e-06	0.431	0.960 (0.867, 1.063)	0.856	0.988 (0.865, 1.128)	0.429	0.853 (0.594, 1.226)	0.377667	6.54368	0.365113	0.0150038	0.53384	No	No	No
98	Irritable bowel syndrome	Anxiety disorders	0.0659	929.61	1100.17	12	5e-06	0.362	1.029 (0.968, 1.093)	0.116	1.068 (0.984, 1.159)	0.433	1.048 (0.936, 1.173)	0.540333	10.1101	0.520514	-0.00337715	0.707425	No	No	No
99	Irritable bowel syndrome	Major depression	0.0468	929.61	1019.73	9	5e-06	1	1.000 (0.958, 1.044)	0.981	0.999 (0.959, 1.042)	0.749	0.983 (0.887, 1.089)	0.0206667	19.5801	0.0120467	0.00273204	0.721467	No	Yes	No
100	Irritable bowel syndrome	Depression	0.0307	929.61	987.22	6	5e-06	0.803	1.003 (0.977, 1.030)	0.95	0.999 (0.966, 1.033)	0.412	1.041 (0.955, 1.135)	0.724	3.04976	0.692314	-0.0046887	0.427999	No	No	No
101	Irritable bowel syndrome	Schizophrenia	0.0519	929.61	1023.09	10	5e-06	0.825	1.008 (0.939, 1.081)	0.939	0.996 (0.909, 1.093)	0.571	1.049 (0.895, 1.230)	0.405	9.36193	0.404557	-0.00646509	0.593482	No	No	No
102	Irritable bowel syndrome	Bipolar disorder	0.0519	929.61	1023.09	10	5e-06	0.065	1.120 (0.993, 1.262)	0.115	1.106 (0.976, 1.255)	0.435	1.122 (0.852, 1.478)	0.0466667	17.6502	0.0394554	-0.000363335	0.98607	No	Yes	No
103	Irritable bowel syndrome	Autism spectrum disorder	0.0417	929.61	1017.37	8	5e-06	0.937	0.996 (0.907, 1.095)	0.876	0.991 (0.883, 1.112)	0.617	1.069 (0.834, 1.370)	0.997333	0.812273	0.997317	-0.0097837	0.568683	No	No	No
104	Irritable bowel syndrome	Mental disorder	0.0659	929.61	1100.17	12	5e-06	0.344	1.130 (0.877, 1.458)	0.68	1.067 (0.784, 1.453)	0.85	1.045 (0.671, 1.626)	0.140667	16.9205	0.110248	0.0158805	0.671859	No	No	No
105	Inflammatory bowel disease	Attention deficit	0.5208	145.91	696.39	54	5e-08	0.651734	1.007 (0.976, 1.040)	0.995768	1.000 (0.957, 1.046)	0.635808	1.022 (0.934, 1.118)	0.021	76.4965	0.019009	-0.00244753	0.736372	No	Yes	No
106	Inflammatory bowel disease	Anxiety disorders	0.528	142.54	703.57	55	5e-08	0.890136	0.998 (0.973, 1.024)	0.392552	0.985 (0.951, 1.020)	0.169707	0.950 (0.884, 1.021)	0.0613333	71.6633	0.0541525	0.00819625	0.156782	No	No	No
107	Inflammatory bowel disease	Major depression	0.5763	142.54	784.18	60	5e-08	0.773405	0.999 (0.990, 1.008)	0.185191	0.991 (0.978, 1.004)	0.869129	0.998 (0.975, 1.021)	0.0226667	81.3119	0.0287057	0.00010549	0.955822	No	Yes	No
108	Inflammatory bowel disease	Depression	0.4402	145.91	566.92	48	5e-08	0.466025	1.004 (0.994, 1.013)	0.371084	1.006 (0.993, 1.019)	0.195489	0.984 (0.962, 1.008)	0.00933333	71.6541	0.0117598	0.00331745	0.0872111	No	Yes	No
109	Inflammatory bowel disease	Schizophrenia	0.5871	142.54	806.31	61	5e-08	0.679586	1.006 (0.978, 1.034)	0.705382	0.993 (0.960, 1.028)	0.586309	1.021 (0.948, 1.099)	<0.001	112.862	4.35031e-05	-0.00253225	0.673012	No	Yes	No
110	Inflammatory bowel disease	Bipolar disorder	0.5871	142.54	806.31	61	5e-08	0.875156	0.998 (0.967, 1.029)	0.646589	1.009 (0.970, 1.051)	0.740737	0.986 (0.907, 1.072)	0.00566667	94.0944	0.00323961	0.00199789	0.768597	No	Yes	No
111	Inflammatory bowel disease	Autism spectrum disorder	0.5277	145.91	702.88	55	5e-08	0.124703	1.026 (0.993, 1.061)	0.168646	1.031 (0.987, 1.076)	0.256863	1.057 (0.962, 1.161)	0.00966667	81.9614	0.00838161	-0.00491294	0.521467	No	Yes	No
112	Inflammatory bowel disease	Mental disorder	0.528	142.54	703.57	55	5e-08	0.257872	1.052 (0.964, 1.148)	0.247084	1.072 (0.953, 1.207)	0.452179	1.100 (0.859, 1.409)	0.140667	65.0079	0.14504	-0.00752427	0.703759	No	No	No
113	Crohn's disease	Attention deficit	0.748	169.89	1405.41	44	5e-08	0.843798	1.003 (0.973, 1.034)	0.821719	1.005 (0.965, 1.045)	0.144701	1.056 (0.983, 1.134)	<0.001	85.1384	0.000136142	-0.0117586	0.129589	No	Yes	No
114	Crohn's disease	Anxiety disorders	0.7988	169.89	1723.59	48	5e-08	0.236362	1.012 (0.992, 1.033)	0.913242	0.998 (0.969, 1.028)	0.69178	1.010 (0.961, 1.062)	0.173333	56.3036	0.165904	0.000467831	0.930479	No	No	No
115	Crohn's disease	Major depression	0.7904	169.89	1671.35	47	5e-08	0.411242	1.004 (0.994, 1.015)	0.921447	0.999 (0.989, 1.010)	0.499854	1.008 (0.985, 1.031)	<0.001	106.034	1.2168e-06	-0.000890522	0.726873	No	Yes	No
116	Crohn's disease	Depression	0.6659	169.89	1065.33	39	5e-08	0.401533	1.004 (0.995, 1.012)	0.576111	1.003 (0.992, 1.014)	0.667957	0.996 (0.978, 1.014)	0.000333333	71.2809	0.000861193	0.00181691	0.366833	No	Yes	No
117	Crohn's disease	Schizophrenia	0.7916	169.89	1683.55	47	5e-08	0.472852	1.009 (0.984, 1.034)	0.77624	0.996 (0.969, 1.024)	0.904225	1.004 (0.948, 1.062)	<0.001	94.1983	3.63748e-05	0.00131306	0.833172	No	Yes	No
118	Crohn's disease	Bipolar disorder	0.8	169.89	1736.6	48	5e-08	0.336604	1.014 (0.985, 1.044)	0.54412	1.010 (0.977, 1.044)	0.955768	1.002 (0.937, 1.071)	0.000333333	87.7303	0.000290052	0.0029217	0.689693	No	Yes	No
119	Crohn's disease	Autism spectrum disorder	0.757	169.89	1442.27	45	5e-08	0.122632	1.021 (0.994, 1.048)	0.024303	1.043 (1.005, 1.081)	0.048311	1.066 (1.002, 1.133)	0.0553333	59.6945	0.0574374	-0.0098735	0.137943	No	No	No
120	Crohn's disease	Mental disorder	0.7988	169.89	1723.59	48	5e-08	0.165294	1.054 (0.979, 1.134)	0.329497	1.052 (0.950, 1.166)	0.591151	1.051 (0.877, 1.261)	0.134	57.9386	0.131669	0.000437623	0.982014	No	No	No
121	Ulcerative colitis	Attention deficit	0.4798	190.65	815.17	31	5e-08	0.015677	1.042 (1.008, 1.078)	0.006628	1.061 (1.017, 1.107)	0.779245	1.014 (0.921, 1.116)	0.104667	40.5424	0.0947785	0.00555747	0.550401	Yes	No	No
122	Ulcerative colitis	Anxiety disorders	0.449	190.65	656.74	34	5e-08	0.915866	1.002 (0.973, 1.031)	0.416101	0.985 (0.951, 1.021)	0.625073	0.976 (0.885, 1.076)	0.052	46.9552	0.0546175	0.00485588	0.586323	No	No	No
123	Ulcerative colitis	Major depression	0.5024	190.65	813.55	34	5e-08	0.963791	1.000 (0.989, 1.012)	0.268268	0.992 (0.978, 1.006)	0.32501	0.986 (0.959, 1.014)	0.001	63.7711	0.00102704	0.00313089	0.271011	No	Yes	No
124	Ulcerative colitis	Depression	0.3394	190.65	521.45	27	5e-08	0.414468	1.005 (0.993, 1.018)	0.835936	1.002 (0.987, 1.017)	0.074228	0.968 (0.936, 1.002)	0.001	50.4914	0.00274563	0.00725375	0.0299231	No	Yes	Yes
125	Ulcerative colitis	Schizophrenia	0.5311	190.65	886.61	35	5e-08	0.733196	1.006 (0.972, 1.041)	0.624007	0.992 (0.958, 1.026)	0.531815	0.971 (0.886, 1.064)	<0.001	85.9105	2.21945e-06	0.00735371	0.417657	No	Yes	No
126	Ulcerative colitis	Bipolar disorder	0.5311	190.65	886.61	35	5e-08	0.734459	0.994 (0.962, 1.027)	0.660366	0.991 (0.951, 1.033)	0.28525	0.953 (0.874, 1.039)	0.0346667	51.5387	0.0273863	0.00881489	0.308391	No	Yes	No
127	Ulcerative colitis	Autism spectrum disorder	0.4934	190.65	834.08	32	5e-08	0.064462	1.032 (0.998, 1.068)	0.197333	1.029 (0.985, 1.075)	0.669134	1.021 (0.928, 1.124)	0.087	42.4263	0.0828807	0.00219315	0.815327	No	No	No
128	Ulcerative colitis	Mental disorder	0.449	190.65	656.74	34	5e-08	0.313705	1.053 (0.952, 1.165)	0.564374	0.963 (0.849, 1.094)	0.814138	1.042 (0.742, 1.462)	0.078	45.0549	0.0786905	0.00199497	0.948693	No	No	No

## Sheet: S3
Supplementary Table 3. The instrumental variables of exposures which had significant causal effects in bidirectional MR analyses and survived after sensitivity analyses.
Traits	SNP	Disease	Chromosome	Position	Effect allele	eaf	SE	beta	pval	samplesize	R2	F
Gastric ulcer (forward)	rs1021363	Major depression	10	106610839	G	0.6434	0.0045	-0.03	2.28718e-11	500199	0.000412986	44.4444
Gastric ulcer (forward)	rs10235664	Major depression	7	2086814	C	0.2529	0.0049	-0.027	4.67703e-08	500199	0.000275477	30.3623
Gastric ulcer (forward)	rs10913112	Major depression	1	175913828	T	0.378	0.0045	-0.0262	4.52501e-09	500199	0.000322786	33.8983
Gastric ulcer (forward)	rs12919291	Major depression	16	13800430	C	0.1884	0.0055	0.0327	3.092e-09	500199	0.000327001	35.3484
Gastric ulcer (forward)	rs12967143	Major depression	18	53099012	C	0.7012	0.0047	-0.0345	2.52697e-13	500199	0.000498759	53.8818
Gastric ulcer (forward)	rs13037326	Major depression	20	44692598	T	0.2597	0.0049	0.031	2.398e-10	500199	0.000369516	40.025
Gastric ulcer (forward)	rs1367635	Major depression	18	50861409	C	0.5148	0.0043	0.0253	4.35402e-09	500199	0.000319765	34.6182
Gastric ulcer (forward)	rs150186873	Major depression	6	27182377	C	0.0327	0.012	0.0704	4.51305e-09	500199	0.000313534	34.4178
Gastric ulcer (forward)	rs17641524	Major depression	1	197704717	T	0.2101	0.0053	-0.03	1.502e-08	500199	0.000298724	32.0399
Gastric ulcer (forward)	rs1931388	Major depression	9	11203149	G	0.4042	0.0044	-0.0295	1.67996e-11	500199	0.000419151	44.9509
Gastric ulcer (forward)	rs1950829	Major depression	14	42097937	G	0.5173	0.0043	-0.0297	4.73805e-12	500199	0.000440517	47.7063
Gastric ulcer (forward)	rs198457	Major depression	11	61471678	T	0.1886	0.0056	-0.0315	1.89998e-08	500199	0.000303688	31.6406
Gastric ulcer (forward)	rs2111592	Major depression	2	208049581	A	0.3141	0.0046	0.0263	1.34999e-08	500199	0.000298037	32.6886
Gastric ulcer (forward)	rs2214123	Major depression	6	67000001	G	0.6466	0.0045	-0.0261	8.55598e-09	500199	0.000311324	33.64
Gastric ulcer (forward)	rs2232423	Major depression	6	28366151	G	0.1056	0.007	-0.062	1.13501e-18	500199	0.000726121	78.449
Gastric ulcer (forward)	rs2418449	Major depression	9	119731359	C	0.281	0.0048	-0.0281	4.24502e-09	500199	0.000319064	34.2713
Gastric ulcer (forward)	rs247910	Major depression	5	87630769	G	0.457	0.0043	0.0237	4.71205e-08	500199	0.000278768	30.378
Gastric ulcer (forward)	rs2522831	Major depression	7	82448100	C	0.4739	0.0043	0.024	2.113e-08	500199	0.000287215	31.152
Gastric ulcer (forward)	rs2568958	Major depression	1	72765116	A	0.6042	0.0044	0.0382	2.90202e-18	500199	0.000697932	75.374
Gastric ulcer (forward)	rs28541419	Major depression	15	88945878	G	0.2308	0.0052	-0.0292	1.75598e-08	500199	0.000302741	31.5325
Gastric ulcer (forward)	rs30266	Major depression	5	103972357	A	0.3271	0.0046	0.0366	1.42791e-15	500199	0.000589689	63.3062
Gastric ulcer (forward)	rs354155	Major depression	1	49675276	C	0.0923	0.0075	-0.0449	1.75102e-09	500199	0.000337805	35.8402
Gastric ulcer (forward)	rs3807865	Major depression	7	12250402	A	0.4105	0.0044	0.031	1.09295e-12	500199	0.000465104	49.6384
Gastric ulcer (forward)	rs4141983	Major depression	1	18122009	C	0.326	0.0046	-0.0264	9.69192e-09	500199	0.000306278	32.9376
Gastric ulcer (forward)	rs4497414	Major depression	11	88756779	C	0.44	0.0044	0.0291	2.92685e-11	500199	0.000417308	43.7402
Gastric ulcer (forward)	rs4799949	Major depression	18	35155910	T	0.6684	0.0046	-0.0292	1.40301e-10	500199	0.000377961	40.2949
Gastric ulcer (forward)	rs4936276	Major depression	11	113365141	C	0.622	0.0044	0.0278	3.57001e-10	500199	0.000363414	39.9194
Gastric ulcer (forward)	rs508502	Major depression	13	80921519	T	0.2992	0.0048	-0.0264	3.55599e-08	500199	0.000292276	30.25
Gastric ulcer (forward)	rs59082935	Major depression	7	38724868	T	0.1342	0.0066	0.0363	3.071e-08	500199	0.000306206	30.25
Gastric ulcer (forward)	rs61914045	Major depression	12	52352301	A	0.2034	0.0054	0.0309	7.96398e-09	500199	0.000309413	32.7438
Gastric ulcer (forward)	rs62535714	Major depression	9	37182655	A	0.1639	0.0058	0.0339	4.68598e-09	500199	0.000314968	34.162
Gastric ulcer (forward)	rs66511648	Major depression	3	117515519	C	0.284	0.0048	0.0297	6.03004e-10	500199	0.000358735	38.2852
Gastric ulcer (forward)	rs7152906	Major depression	14	75125540	C	0.5196	0.0043	0.0258	1.87301e-09	500199	0.000332309	36
Gastric ulcer (forward)	rs7241572	Major depression	18	77580712	A	0.2047	0.0054	0.0323	2.43299e-09	500199	0.000339691	35.7781
Gastric ulcer (forward)	rs7538938	Major depression	1	67132262	C	0.5599	0.0043	0.0251	7.28903e-09	500199	0.000310484	34.073
Gastric ulcer (forward)	rs754287	Major depression	14	103997525	A	0.3664	0.0045	-0.0289	1.31099e-10	500199	0.00038779	41.2449
Gastric ulcer (forward)	rs7551758	Major depression	1	52274078	G	0.5329	0.0043	0.0283	5.1074e-11	500199	0.000398711	43.3148
Gastric ulcer (forward)	rs76954012	Major depression	3	115977242	A	0.0931	0.0074	0.0412	2.41002e-08	500199	0.000286638	30.9978
Gastric ulcer (forward)	rs7725715	Major depression	5	164487555	A	0.5343	0.0043	0.029	1.60694e-11	500199	0.000418521	45.484
Gastric ulcer (forward)	rs843812	Major depression	3	61255413	A	0.4117	0.0044	0.0248	1.40501e-08	500199	0.000297929	31.7686
Gastric ulcer (forward)	rs9364755	Major depression	6	165117329	G	0.2262	0.0051	0.0283	3.48602e-08	500199	0.000280365	30.7916
Gastric ulcer (forward)	rs9529218	Major depression	13	31790053	T	0.2031	0.0054	-0.034	2.231e-10	500199	0.000374198	39.6433
Gastric ulcer (forward)	rs9536381	Major depression	13	53860655	T	0.3259	0.0046	0.0255	2.61698e-08	500199	0.000285706	30.7302
Gastric ulcer (forward)	rs9831648	Major depression	3	49214303	T	0.7739	0.0052	-0.0292	1.58599e-08	500199	0.000298388	31.5325
Irritable bowel syndrome(forward)	rs1021363	Major depression	10	106610839	G	0.6434	0.0045	-0.03	2.28718e-11	500199	0.000412986	44.4444
Irritable bowel syndrome(forward)	rs10235664	Major depression	7	2086814	C	0.2529	0.0049	-0.027	4.67703e-08	500199	0.000275477	30.3623
Irritable bowel syndrome(forward)	rs10913112	Major depression	1	175913828	T	0.378	0.0045	-0.0262	4.52501e-09	500199	0.000322786	33.8983
Irritable bowel syndrome(forward)	rs12919291	Major depression	16	13800430	C	0.1884	0.0055	0.0327	3.092e-09	500199	0.000327001	35.3484
Irritable bowel syndrome(forward)	rs12967143	Major depression	18	53099012	C	0.7012	0.0047	-0.0345	2.52697e-13	500199	0.000498759	53.8818
Irritable bowel syndrome(forward)	rs13037326	Major depression	20	44692598	T	0.2597	0.0049	0.031	2.398e-10	500199	0.000369516	40.025
Irritable bowel syndrome(forward)	rs1367635	Major depression	18	50861409	C	0.5148	0.0043	0.0253	4.35402e-09	500199	0.000319765	34.6182
Irritable bowel syndrome(forward)	rs150186873	Major depression	6	27182377	C	0.0327	0.012	0.0704	4.51305e-09	500199	0.000313534	34.4178
Irritable bowel syndrome(forward)	rs17641524	Major depression	1	197704717	T	0.2101	0.0053	-0.03	1.502e-08	500199	0.000298724	32.0399
Irritable bowel syndrome(forward)	rs1931388	Major depression	9	11203149	G	0.4042	0.0044	-0.0295	1.67996e-11	500199	0.000419151	44.9509
Irritable bowel syndrome(forward)	rs1950829	Major depression	14	42097937	G	0.5173	0.0043	-0.0297	4.73805e-12	500199	0.000440517	47.7063
Irritable bowel syndrome(forward)	rs198457	Major depression	11	61471678	T	0.1886	0.0056	-0.0315	1.89998e-08	500199	0.000303688	31.6406
Irritable bowel syndrome(forward)	rs2111592	Major depression	2	208049581	A	0.3141	0.0046	0.0263	1.34999e-08	500199	0.000298037	32.6886
Irritable bowel syndrome(forward)	rs2214123	Major depression	6	67000001	G	0.6466	0.0045	-0.0261	8.55598e-09	500199	0.000311324	33.64
Irritable bowel syndrome(forward)	rs2232423	Major depression	6	28366151	G	0.1056	0.007	-0.062	1.13501e-18	500199	0.000726121	78.449
Irritable bowel syndrome(forward)	rs2418449	Major depression	9	119731359	C	0.281	0.0048	-0.0281	4.24502e-09	500199	0.000319064	34.2713
Irritable bowel syndrome(forward)	rs247910	Major depression	5	87630769	G	0.457	0.0043	0.0237	4.71205e-08	500199	0.000278768	30.378
Irritable bowel syndrome(forward)	rs2522831	Major depression	7	82448100	C	0.4739	0.0043	0.024	2.113e-08	500199	0.000287215	31.152
Irritable bowel syndrome(forward)	rs2568958	Major depression	1	72765116	A	0.6042	0.0044	0.0382	2.90202e-18	500199	0.000697932	75.374
Irritable bowel syndrome(forward)	rs28541419	Major depression	15	88945878	G	0.2308	0.0052	-0.0292	1.75598e-08	500199	0.000302741	31.5325
Irritable bowel syndrome(forward)	rs30266	Major depression	5	103972357	A	0.3271	0.0046	0.0366	1.42791e-15	500199	0.000589689	63.3062
Irritable bowel syndrome(forward)	rs354155	Major depression	1	49675276	C	0.0923	0.0075	-0.0449	1.75102e-09	500199	0.000337805	35.8402
Irritable bowel syndrome(forward)	rs3807865	Major depression	7	12250402	A	0.4105	0.0044	0.031	1.09295e-12	500199	0.000465104	49.6384
Irritable bowel syndrome(forward)	rs4141983	Major depression	1	18122009	C	0.326	0.0046	-0.0264	9.69192e-09	500199	0.000306278	32.9376
Irritable bowel syndrome(forward)	rs4497414	Major depression	11	88756779	C	0.44	0.0044	0.0291	2.92685e-11	500199	0.000417308	43.7402
Irritable bowel syndrome(forward)	rs4799949	Major depression	18	35155910	T	0.6684	0.0046	-0.0292	1.40301e-10	500199	0.000377961	40.2949
Irritable bowel syndrome(forward)	rs4936276	Major depression	11	113365141	C	0.622	0.0044	0.0278	3.57001e-10	500199	0.000363414	39.9194
Irritable bowel syndrome(forward)	rs508502	Major depression	13	80921519	T	0.2992	0.0048	-0.0264	3.55599e-08	500199	0.000292276	30.25
Irritable bowel syndrome(forward)	rs59082935	Major depression	7	38724868	T	0.1342	0.0066	0.0363	3.071e-08	500199	0.000306206	30.25
Irritable bowel syndrome(forward)	rs61914045	Major depression	12	52352301	A	0.2034	0.0054	0.0309	7.96398e-09	500199	0.000309413	32.7438
Irritable bowel syndrome(forward)	rs62535714	Major depression	9	37182655	A	0.1639	0.0058	0.0339	4.68598e-09	500199	0.000314968	34.162
Irritable bowel syndrome(forward)	rs66511648	Major depression	3	117515519	C	0.284	0.0048	0.0297	6.03004e-10	500199	0.000358735	38.2852
Irritable bowel syndrome(forward)	rs7152906	Major depression	14	75125540	C	0.5196	0.0043	0.0258	1.87301e-09	500199	0.000332309	36
Irritable bowel syndrome(forward)	rs7241572	Major depression	18	77580712	A	0.2047	0.0054	0.0323	2.43299e-09	500199	0.000339691	35.7781
Irritable bowel syndrome(forward)	rs7538938	Major depression	1	67132262	C	0.5599	0.0043	0.0251	7.28903e-09	500199	0.000310484	34.073
Irritable bowel syndrome(forward)	rs754287	Major depression	14	103997525	A	0.3664	0.0045	-0.0289	1.31099e-10	500199	0.00038779	41.2449
Irritable bowel syndrome(forward)	rs7551758	Major depression	1	52274078	G	0.5329	0.0043	0.0283	5.1074e-11	500199	0.000398711	43.3148
Irritable bowel syndrome(forward)	rs76954012	Major depression	3	115977242	A	0.0931	0.0074	0.0412	2.41002e-08	500199	0.000286638	30.9978
Irritable bowel syndrome(forward)	rs7725715	Major depression	5	164487555	A	0.5343	0.0043	0.029	1.60694e-11	500199	0.000418521	45.484
Irritable bowel syndrome(forward)	rs843812	Major depression	3	61255413	A	0.4117	0.0044	0.0248	1.40501e-08	500199	0.000297929	31.7686
Irritable bowel syndrome(forward)	rs9364755	Major depression	6	165117329	G	0.2262	0.0051	0.0283	3.48602e-08	500199	0.000280365	30.7916
Irritable bowel syndrome(forward)	rs9529218	Major depression	13	31790053	T	0.2031	0.0054	-0.034	2.231e-10	500199	0.000374198	39.6433
Irritable bowel syndrome(forward)	rs9536381	Major depression	13	53860655	T	0.3259	0.0046	0.0255	2.61698e-08	500199	0.000285706	30.7302
Irritable bowel syndrome(forward)	rs9831648	Major depression	3	49214303	T	0.7739	0.0052	-0.0292	1.58599e-08	500199	0.000298388	31.5325
Gastroesophageal reflux disease(reverse)	rs10010963	Anxiety disorder	4	159839313	T	0.616433	0.00494665	-0.0269803	4.91779e-08	602604	0.000344232	29.7489
Gastroesophageal reflux disease(reverse)	rs1011407	Anxiety disorder	2	60665768	G	0.121628	0.00735917	-0.0420618	1.09343e-08	602604	0.000378023	32.6677
Gastroesophageal reflux disease(reverse)	rs10133111	Anxiety disorder	14	103377321	A	0.162996	0.00650789	0.0417875	1.35338e-10	602604	0.000476461	41.2299
Gastroesophageal reflux disease(reverse)	rs1021363	Anxiety disorder	10	106610839	G	0.641992	0.00502204	-0.031217	5.09976e-10	602604	0.000447955	38.6387
Gastroesophageal reflux disease(reverse)	rs10837002	Anxiety disorder	11	38565727	G	0.35122	0.00503665	0.0276491	4.02893e-08	602604	0.000348392	30.1355
Gastroesophageal reflux disease(reverse)	rs11762636	Anxiety disorder	7	2061111	A	0.180282	0.00625598	-0.0514827	1.88235e-16	602604	0.000783375	67.7223
Gastroesophageal reflux disease(reverse)	rs11953061	Anxiety disorder	5	120144025	T	0.338908	0.00508694	0.0281599	3.09949e-08	602604	0.000355333	30.6442
Gastroesophageal reflux disease(reverse)	rs12204714	Anxiety disorder	6	152235339	T	0.632223	0.00499422	-0.028817	7.9241e-09	602604	0.000386173	33.2937
Gastroesophageal reflux disease(reverse)	rs12357321	Anxiety disorder	10	21790476	A	0.311087	0.00523077	0.0317159	1.33325e-09	602604	0.000431152	36.764
Gastroesophageal reflux disease(reverse)	rs12453010	Anxiety disorder	17	50316131	T	0.394803	0.00493315	0.0296967	1.74606e-09	602604	0.000421428	36.2383
Gastroesophageal reflux disease(reverse)	rs12598916	Anxiety disorder	16	60658751	G	0.274798	0.00539171	-0.0332614	6.8729e-10	602604	0.000440944	38.0564
Gastroesophageal reflux disease(reverse)	rs12967855	Anxiety disorder	18	35138245	G	0.670435	0.00513354	-0.0365451	1.08793e-12	602604	0.000590182	50.6786
Gastroesophageal reflux disease(reverse)	rs12997558	Anxiety disorder	2	41704580	A	0.358751	0.00502214	0.0278184	3.03941e-08	602604	0.000356053	30.6822
Gastroesophageal reflux disease(reverse)	rs13107325	Anxiety disorder	4	103188709	T	0.074445	0.00918312	0.0701443	2.19938e-14	602604	0.000678036	58.3451
Gastroesophageal reflux disease(reverse)	rs1334297	Anxiety disorder	13	58335375	A	0.734249	0.00545512	-0.0387984	1.1413e-12	602604	0.000587457	50.5847
Gastroesophageal reflux disease(reverse)	rs13409451	Anxiety disorder	2	144257639	G	0.392403	0.00493183	-0.0277081	1.92943e-08	602604	0.000366093	31.5644
Gastroesophageal reflux disease(reverse)	rs1431196	Anxiety disorder	18	50832102	G	0.428432	0.00486448	0.0324197	2.65461e-11	602604	0.000514752	44.4166
Gastroesophageal reflux disease(reverse)	rs1479405	Anxiety disorder	12	15387519	T	0.3217	0.0051514	0.0314843	9.85213e-10	602604	0.000432604	37.354
Gastroesophageal reflux disease(reverse)	rs1510719	Anxiety disorder	4	140938116	C	0.383439	0.00494701	-0.0388844	3.83619e-15	602604	0.000714913	61.7825
Gastroesophageal reflux disease(reverse)	rs1592757	Anxiety disorder	5	103889998	C	0.355772	0.00502465	0.0311051	5.9975e-10	602604	0.000443511	38.3223
Gastroesophageal reflux disease(reverse)	rs1596747	Anxiety disorder	2	193802478	G	0.494136	0.00480742	0.0310869	1.00344e-10	602604	0.000483131	41.8149
Gastroesophageal reflux disease(reverse)	rs1716171	Anxiety disorder	12	123716376	T	0.790024	0.00590382	0.0383981	7.82528e-11	602604	0.00048917	42.3013
Gastroesophageal reflux disease(reverse)	rs17379561	Anxiety disorder	1	98340139	T	0.144391	0.00686573	0.0530714	1.07622e-14	602604	0.000695932	59.7513
Gastroesophageal reflux disease(reverse)	rs1883842	Anxiety disorder	20	41223062	G	0.279255	0.00536826	0.0308332	9.26766e-09	602604	0.000382692	32.9891
Gastroesophageal reflux disease(reverse)	rs1937450	Anxiety disorder	1	66478840	G	0.537739	0.00484484	0.0315845	7.06806e-11	602604	0.000495949	42.5
Gastroesophageal reflux disease(reverse)	rs2016933	Anxiety disorder	3	65653157	G	0.730053	0.00542057	-0.0310253	1.04275e-08	602604	0.000379398	32.7599
Gastroesophageal reflux disease(reverse)	rs2023878	Anxiety disorder	19	18834124	T	0.192377	0.00611913	-0.0362846	3.03501e-09	602604	0.000409107	35.1613
Gastroesophageal reflux disease(reverse)	rs2043539	Anxiety disorder	7	12253880	A	0.41866	0.00486485	0.0272058	2.24042e-08	602604	0.000360284	31.274
Gastroesophageal reflux disease(reverse)	rs215614	Anxiety disorder	7	32347335	A	0.629725	0.00497715	-0.0328541	4.08413e-11	602604	0.000503367	43.573
Gastroesophageal reflux disease(reverse)	rs2164300	Anxiety disorder	4	67813017	T	0.523279	0.00482677	-0.0264751	4.13352e-08	602604	0.000349706	30.0858
Gastroesophageal reflux disease(reverse)	rs2240326	Anxiety disorder	3	50128386	A	0.473775	0.00481335	-0.0471681	1.13214e-22	602604	0.00110935	96.0289
Gastroesophageal reflux disease(reverse)	rs2396133	Anxiety disorder	7	109197067	G	0.475329	0.00481787	0.0293547	1.10889e-09	602604	0.0004298	37.1232
Gastroesophageal reflux disease(reverse)	rs2396766	Anxiety disorder	7	114318071	A	0.47308	0.00481878	0.0322057	2.33507e-11	602604	0.0005171	44.6675
Gastroesophageal reflux disease(reverse)	rs2734839	Anxiety disorder	11	113286490	T	0.606693	0.00492778	-0.0283478	8.78537e-09	602604	0.000383504	33.093
Gastroesophageal reflux disease(reverse)	rs2744961	Anxiety disorder	6	34655000	T	0.358437	0.00501549	0.0292007	5.81126e-09	602604	0.000392165	33.8969
Gastroesophageal reflux disease(reverse)	rs2782641	Anxiety disorder	1	44013355	A	0.612669	0.00494583	0.0270882	4.32643e-08	602604	0.000348256	29.9973
Gastroesophageal reflux disease(reverse)	rs2815749	Anxiety disorder	1	72814783	G	0.800974	0.0060216	0.0388767	1.07359e-10	602604	0.000481878	41.6826
Gastroesophageal reflux disease(reverse)	rs2834005	Anxiety disorder	21	34291708	C	0.315	0.0051734	0.0296997	9.42041e-09	602604	0.000380658	32.9573
Gastroesophageal reflux disease(reverse)	rs2838771	Anxiety disorder	21	46501576	C	0.646721	0.00506571	-0.0280984	2.90964e-08	602604	0.000360768	30.7668
Gastroesophageal reflux disease(reverse)	rs324769	Anxiety disorder	12	83969240	T	0.449179	0.00483328	-0.0267699	3.04775e-08	602604	0.000354612	30.6768
Gastroesophageal reflux disease(reverse)	rs329122	Anxiety disorder	5	133864599	A	0.419631	0.00488358	-0.0289529	3.05485e-09	602604	0.000408306	35.1486
Gastroesophageal reflux disease(reverse)	rs3766823	Anxiety disorder	1	32197257	A	0.171467	0.00638545	0.0393599	7.09316e-10	602604	0.000440178	37.9949
Gastroesophageal reflux disease(reverse)	rs3793577	Anxiety disorder	9	23737627	G	0.538279	0.00484976	0.0270309	2.49436e-08	602604	0.000363194	31.0657
Gastroesophageal reflux disease(reverse)	rs3828917	Anxiety disorder	6	31465917	T	0.041826	0.0120054	0.0671113	2.26945e-08	602604	0.000361004	31.2491
Gastroesophageal reflux disease(reverse)	rs3863241	Anxiety disorder	8	73890335	T	0.52696	0.00481521	0.0324982	1.48799e-11	602604	0.000526531	45.55
Gastroesophageal reflux disease(reverse)	rs4300861	Anxiety disorder	2	22549441	T	0.38208	0.00494886	0.0307132	5.431e-10	602604	0.000445417	38.5159
Gastroesophageal reflux disease(reverse)	rs4382592	Anxiety disorder	9	134870755	G	0.699524	0.00525091	-0.0302679	8.19917e-09	602604	0.00038513	33.2273
Gastroesophageal reflux disease(reverse)	rs4713692	Anxiety disorder	6	33807638	T	0.367808	0.00498634	-0.0276128	3.06507e-08	602604	0.000354586	30.666
Gastroesophageal reflux disease(reverse)	rs569356	Anxiety disorder	1	29136686	G	0.140835	0.00690971	-0.037919	4.07005e-08	602604	0.000347961	30.1158
Gastroesophageal reflux disease(reverse)	rs6711584	Anxiety disorder	2	104421692	A	0.452019	0.00483974	0.0322545	2.65583e-11	602604	0.000515386	44.4157
Gastroesophageal reflux disease(reverse)	rs6722661	Anxiety disorder	2	100806588	A	0.364669	0.00500354	-0.0322543	1.14623e-10	602604	0.000482063	41.5547
Gastroesophageal reflux disease(reverse)	rs6780459	Anxiety disorder	3	104624105	T	0.746622	0.0055211	0.0305507	3.13993e-08	602604	0.000353136	30.619
Gastroesophageal reflux disease(reverse)	rs7032155	Anxiety disorder	9	122672771	A	0.59185	0.00491358	0.02775	1.62686e-08	602604	0.000372038	31.8955
Gastroesophageal reflux disease(reverse)	rs7206608	Anxiety disorder	16	82872628	G	0.322927	0.005145	0.0291541	1.45761e-08	602604	0.00037168	32.1091
Gastroesophageal reflux disease(reverse)	rs7241572	Anxiety disorder	18	77580712	A	0.209101	0.00597464	0.0365511	9.49336e-10	602604	0.000441884	37.4263
Gastroesophageal reflux disease(reverse)	rs7527682	Anxiety disorder	1	189172684	G	0.53725	0.00482174	-0.026684	3.12831e-08	602604	0.000354042	30.6263
Gastroesophageal reflux disease(reverse)	rs7541875	Anxiety disorder	1	190957589	G	0.426069	0.00484976	0.0273972	1.61213e-08	602604	0.000367098	31.9133
Gastroesophageal reflux disease(reverse)	rs7600261	Anxiety disorder	2	212622818	T	0.306391	0.00522051	0.0338034	9.47327e-11	602604	0.00048567	41.9271
Gastroesophageal reflux disease(reverse)	rs7612999	Anxiety disorder	3	35678337	A	0.245338	0.00559546	0.0305231	4.89824e-08	602604	0.000344988	29.7568
Gastroesophageal reflux disease(reverse)	rs761777	Anxiety disorder	10	134938075	G	0.254034	0.00554469	0.0345341	4.71455e-10	602604	0.000451999	38.792
Gastroesophageal reflux disease(reverse)	rs7675588	Anxiety disorder	4	80734978	A	0.794635	0.00595438	-0.0335228	1.80264e-08	602604	0.000366779	31.6962
Gastroesophageal reflux disease(reverse)	rs7685686	Anxiety disorder	4	3207142	G	0.422353	0.00489191	-0.0279222	1.14427e-08	602604	0.000380424	32.5793
Gastroesophageal reflux disease(reverse)	rs773109	Anxiety disorder	12	56374695	A	0.335269	0.00510213	-0.0380572	8.71365e-14	602604	0.000645569	55.6379
Gastroesophageal reflux disease(reverse)	rs7942368	Anxiety disorder	11	76465362	T	0.214659	0.00591917	-0.0339683	9.54135e-09	602604	0.000389032	32.9326
Gastroesophageal reflux disease(reverse)	rs903678	Anxiety disorder	1	201809918	A	0.339412	0.00508463	0.0277378	4.89091e-08	602604	0.00034501	29.7595
Gastroesophageal reflux disease(reverse)	rs903959	Anxiety disorder	8	142630782	A	0.399262	0.00491608	0.0291631	2.9893e-09	602604	0.000407981	35.1908
Gastroesophageal reflux disease(reverse)	rs9372625	Anxiety disorder	6	98344031	A	0.383042	0.0049537	-0.037727	2.61818e-14	602604	0.000672723	58.0023
Gastroesophageal reflux disease(reverse)	rs9373363	Anxiety disorder	6	143150043	G	0.253631	0.00555966	-0.0326836	4.13457e-09	602604	0.000404432	34.5592
Gastroesophageal reflux disease(reverse)	rs9396740	Anxiety disorder	6	17023108	A	0.248794	0.0055587	-0.031493	1.46562e-08	602604	0.000370729	32.0983
Gastroesophageal reflux disease(reverse)	rs942065	Anxiety disorder	14	94032065	A	0.634045	0.00500925	0.0307384	8.44559e-10	602604	0.00043847	37.6545
Gastroesophageal reflux disease(reverse)	rs9529055	Anxiety disorder	13	66957533	A	0.475633	0.00481637	0.0266604	3.10549e-08	602604	0.000354544	30.6403
Gastroesophageal reflux disease(reverse)	rs9542729	Anxiety disorder	13	31833578	G	0.20244	0.00599914	-0.0363194	1.41205e-09	602604	0.000425958	36.6521
Gastroesophageal reflux disease(reverse)	rs9615905	Anxiety disorder	22	48875699	T	0.458193	0.0048378	0.0275657	1.21233e-08	602604	0.000377278	32.467
Gastroesophageal reflux disease(reverse)	rs9636202	Anxiety disorder	19	18449238	A	0.26663	0.00547191	-0.035044	1.51022e-10	602604	0.000480274	41.0156
Gastroesophageal reflux disease(reverse)	rs9940128	Anxiety disorder	16	53800754	A	0.421755	0.00486305	0.0332513	8.05749e-12	602604	0.000539286	46.752
Ulcerative colitis(reverse)	rs10182512	Attention deficit/hyperactivity disorder	2	61189469	A	0.34989	0.0223	0.1608	5.19398e-13	27432	0.0117631	51.9951
Ulcerative colitis(reverse)	rs10272963	Attention deficit/hyperactivity disorder	7	107486902	T	0.426078	0.0216	-0.171904	1.69083e-15	27432	0.0144525	63.338
Ulcerative colitis(reverse)	rs10737481	Attention deficit/hyperactivity disorder	1	20171514	G	0.556463	0.0216	0.250104	4.36918e-31	27432	0.0308772	134.071
Ulcerative colitis(reverse)	rs10917545	Attention deficit/hyperactivity disorder	1	20128177	A	0.882174	0.0335	-0.185101	3.29397e-08	27432	0.00712267	30.5301
Ulcerative colitis(reverse)	rs11209026	Attention deficit/hyperactivity disorder	1	67705958	A	0.0589321	0.0517	-0.561698	1.58016e-27	27432	0.0349952	118.039
Ulcerative colitis(reverse)	rs114152040	Attention deficit/hyperactivity disorder	5	40444986	A	0.0317179	0.0623	0.339603	4.94903e-08	27432	0.00708401	29.7144
Ulcerative colitis(reverse)	rs12612675	Attention deficit/hyperactivity disorder	2	219133137	G	0.402826	0.0219	0.122902	1.97702e-08	27432	0.00726719	31.4941
Ulcerative colitis(reverse)	rs12817473	Attention deficit/hyperactivity disorder	12	68497408	G	0.382176	0.0217	0.190701	1.70883e-18	27432	0.0171737	77.2301
Ulcerative colitis(reverse)	rs1359946	Attention deficit/hyperactivity disorder	13	27536972	A	0.196096	0.0269	0.158302	3.83796e-09	27432	0.00790088	34.6313
Ulcerative colitis(reverse)	rs137845	Attention deficit/hyperactivity disorder	22	50439430	G	0.514874	0.0212	0.118198	2.37602e-08	27432	0.0069792	31.0848
Ulcerative colitis(reverse)	rs1801274	Attention deficit/hyperactivity disorder	1	161479745	G	0.483094	0.0217	-0.182896	3.77833e-17	27432	0.0167064	71.0377
Ulcerative colitis(reverse)	rs1886731	Attention deficit/hyperactivity disorder	1	2472081	C	0.480618	0.0221	-0.140501	2.25398e-10	27432	0.00985543	40.418
Ulcerative colitis(reverse)	rs2212434	Attention deficit/hyperactivity disorder	11	76281593	T	0.459604	0.0213	0.141899	2.4632e-11	27432	0.0100019	44.3812
Ulcerative colitis(reverse)	rs254559	Attention deficit/hyperactivity disorder	5	134444982	A	0.404112	0.0215	0.124304	7.62799e-09	27432	0.0074416	33.4267
Ulcerative colitis(reverse)	rs28383456	Attention deficit/hyperactivity disorder	6	32609453	T	0.334505	0.0256	-0.337307	1.073e-39	27432	0.0506557	173.608
Ulcerative colitis(reverse)	rs3024493	Attention deficit/hyperactivity disorder	1	206943968	A	0.168128	0.0276	0.236297	1.09194e-17	27432	0.0156186	73.299
Ulcerative colitis(reverse)	rs3829111	Attention deficit/hyperactivity disorder	9	139269483	A	0.416668	0.0214	0.156303	2.89401e-13	27432	0.011876	53.3466
Ulcerative colitis(reverse)	rs4574921	Attention deficit/hyperactivity disorder	9	117538334	T	0.740842	0.0256	0.150599	4.23897e-09	27432	0.00870892	34.607
Ulcerative colitis(reverse)	rs483905	Attention deficit/hyperactivity disorder	11	96023427	A	0.294334	0.0228	0.128903	1.57199e-08	27432	0.00690233	31.9636
Ulcerative colitis(reverse)	rs56167332	Attention deficit/hyperactivity disorder	5	158827769	A	0.34162	0.0231	0.151596	5.29907e-11	27432	0.0103377	43.0677
Ulcerative colitis(reverse)	rs6017342	Attention deficit/hyperactivity disorder	20	43065028	C	0.537652	0.024	0.191306	1.38484e-15	27432	0.0181952	63.5382
Ulcerative colitis(reverse)	rs6062496	Attention deficit/hyperactivity disorder	20	62329099	A	0.572636	0.0224	0.158498	1.46791e-12	27432	0.0122957	50.067
Ulcerative colitis(reverse)	rs6933404	Attention deficit/hyperactivity disorder	6	137959235	C	0.21562	0.0252	0.166799	3.68468e-11	27432	0.00941093	43.8113
Ulcerative colitis(reverse)	rs7282490	Attention deficit/hyperactivity disorder	21	45615741	A	0.603618	0.0214	-0.139699	7.0762e-11	27432	0.00933883	42.6147
Ulcerative colitis(reverse)	rs7523335	Attention deficit/hyperactivity disorder	1	8180210	A	0.176698	0.0285	-0.170397	2.28802e-09	27432	0.00844782	35.7466
Ulcerative colitis(reverse)	rs7752873	Attention deficit/hyperactivity disorder	6	106579332	T	0.13681	0.0303	0.182297	1.83299e-09	27432	0.00784898	36.1971
Ulcerative colitis(reverse)	rs7911680	Attention deficit/hyperactivity disorder	10	101293468	C	0.490094	0.0213	-0.1718	8.26609e-16	27432	0.0147518	65.056
Ulcerative colitis(reverse)	rs798502	Attention deficit/hyperactivity disorder	7	2789880	C	0.283142	0.0239	-0.136496	1.213e-08	27432	0.00756323	32.617
Ulcerative colitis(reverse)	rs9272514	Attention deficit/hyperactivity disorder	6	32606385	T	0.297965	0.0267	-0.401598	4.00129e-51	27432	0.0674741	226.235
Ulcerative colitis(reverse)	rs989960	Attention deficit/hyperactivity disorder	7	107445727	T	0.424904	0.0215	-0.129096	1.766e-09	27432	0.00814492	36.0536
Ulcerative colitis(reverse)	rs9977672	Attention deficit/hyperactivity disorder	21	40463283	A	0.251316	0.0261	-0.245006	6.20583e-21	27432	0.0225893	88.1196
